# Supplementary material
Source: PubMed Central journal article supplement (PMC3030921)
Supplement: NIHMS33798-supplement-1.pdf [file NIHMS33798-supplement-1.pdf]

# Supplementary Information

## **Tartrate resistant acid phosphatase deficiency causes a bone dysplasia with autoimmunity and a type I interferon expression signature**

### **Authors and affiliations**

Briggs TA<sup>1</sup>, Rice GI<sup>1</sup>, Daly S<sup>1</sup>, Urquhart J<sup>1</sup>, Gornall H<sup>1</sup>, Bader-Meunier B<sup>2</sup>, Baskar K<sup>3</sup>, Baskar S<sup>3</sup>, Baudouin V<sup>4</sup>, Beresford MW<sup>5</sup>, Black GCM<sup>1</sup>, Dearman RJ<sup>6</sup>, de Zegher F<sup>7</sup>, Foster ES<sup>6</sup>, Francès C<sup>8</sup>, Hayman AR<sup>9</sup>, Hilton E<sup>1</sup>, Job-deslandre C<sup>10</sup>, Kulkarni ML<sup>3</sup>, Le Merrer M<sup>11</sup>, Linglart A<sup>12</sup>, Lovell SC<sup>6</sup>, Maurer K<sup>13</sup>, Musset L<sup>14</sup>, Navarro V<sup>15</sup>, Picard C<sup>16</sup>, Puel A<sup>16</sup>, Rieux-Laucat F<sup>17</sup>, Roifman CM<sup>18</sup>, Scholl-Bürgi S<sup>19</sup>, Smith N<sup>20</sup>, Szykiewicz M<sup>1</sup>, Wiedeman A<sup>21</sup>, Wouters C<sup>7</sup>, Zeef LAH<sup>6</sup>, Casanova J-L<sup>16, 22</sup>, Elkon KB<sup>21</sup>, Janckila A<sup>23</sup>, Lebon P<sup>24</sup>, Crow YJ<sup>1</sup>.

<sup>1</sup> Manchester Academic Health Science Centre, University of Manchester, Genetic Medicine

<sup>2</sup> AP-HP, Necker Hospital, Department of Pediatric Immunology, Hematology and Rheumatology

<sup>3</sup> JJMMC, Department of pediatrics

<sup>4</sup> AP-HP, Robert Debré Hospital, Pediatric Nephrology Department

<sup>5</sup> University of Liverpool, Institute of Child Health

<sup>6</sup> University of Manchester, Faculty of Life Sciences

<sup>7</sup> University of Leuven, Department of Paediatrics

<sup>8</sup> Hopital Tenon, Department of Dermatology and Allergy

<sup>9</sup> University of Bristol, Department of Clinical Veterinary Science

<sup>10</sup> APHP Cochin, Service de Rhumatologie A, Paris

<sup>11</sup> Necker Hospital, INSERM U781

<sup>12</sup> Institut National de la Santé et de la Recherche Médicale, INSERM U986

<sup>13</sup> Innsbruck Medical University, Department of radiology

<sup>14</sup> AP-HP, Immunochemistry

<sup>15</sup> AP-HP, Epilepsy unit

<sup>16</sup> INSERM-U980 Necker Faculty, Laboratory of Human Genetics of Infectious Diseases

<sup>17</sup> INSERM-U768, Necker hospital

<sup>18</sup> The Hospital for Sick Children, The University of Toronto

<sup>19</sup> Innsbruck Medical University, Department of Pediatrics IV, Neonatology, Neuropediatrics and Inherited Metabolic Disorder

<sup>20</sup> Paterson Institute for Cancer Research, University of Manchester, Clinical and Experimental Pharmacology Group

<sup>21</sup> University of Washington, Departments of Medicine and Immunology

<sup>22</sup> The Rockefeller University, Laboratory of Human Genetics of Infectious Diseases

<sup>23</sup> Robley Rex Department of Veterans Affairs Medical Center, Special Hematology Laboratory

<sup>24</sup> Université Paris Descartes, Service Virologie

## **SUPPLEMENTARY NOTE**

### **Patient ascertainment.**

Patients were ascertained based on a clinical suspicion of a diagnosis of SPENCD (see Table 1). Samples were collected for mutation analysis and further investigations as appropriate. Family members and controls samples were recruited accordingly.

### **Description of patient 5.**

Patient 5 was identified with SPENCD at the age of 14 years following a molecular diagnosis in her brother (patient 4). She was under clinical review because of apparently idiopathic short stature, and her only history of immunological disease was of Raynaud's phenomenon. This patient shows a lesser elevation of interferon induced gene transcripts on qPCR, non-elevated titres of ANA and anti-dsDNA antibodies, but a high level of interferon alpha in serum. These data illustrate intrafamilial variability, and possibly suggest that elevated levels of interferon alpha precede the development of serological indices of autoimmunity.

## SUPPLEMENTARY FIGURES

### Supplementary Figure 1. Reverse transcription PCR (RT-PCR) analysis.

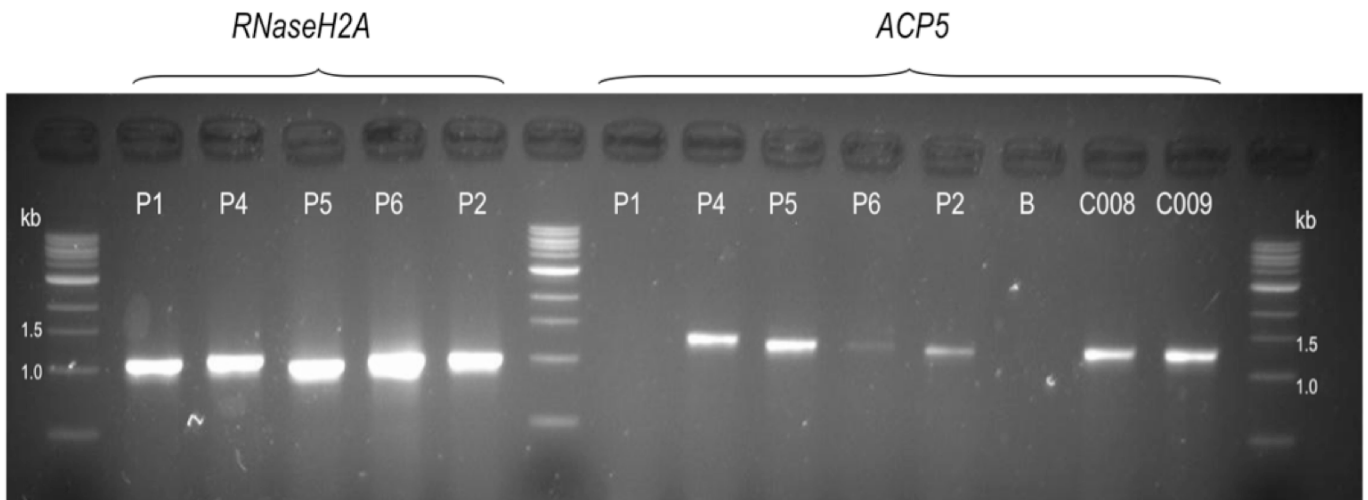

Panel depicts RT-PCR of five patients (P1; homozygous deletion of *ACP5* gene, P4; c.266C>T / T89I, P5; c.266C>T / T89I, P6; c.667C>T / Q223X, P2; c.369C>A / Y123X + c.721 G>A / D241N) and two controls (C008, C009). P represents patient. B is a water blank. RT-PCR was performed using a OneStep RT-PCR kit (Qiagen) with primers specific for *ACP5* cDNA (F: AGGGAGGGAATAAAGGCTCA; and R: TCACATACGTGGGCATCTGT), and *RNaseH2A* as a control gene (F: GCTCCTGCAGTATTAGTTCTTG; and R: TACGTGTGGTTCTCCTTAAACA). *RNaseH2A* PCR product size 1019bp, *ACP5* PCR product size 1256bp. Note complete absence of *ACP5* in P1 compared to normal levels of *RNaseH2A* for the same patient. Note also the reduced levels of *ACP5* in P2 and P6 compared to normal levels of *RNaseH2A*.

**Supplementary Figure 2. Sequence alignment of human TRAP with homologues from eukaryotic species.**

| T89I |   |   |   |   |   |   |   |   |   | D241N |   |   |   |   |   |   |   |   |   |
|------|---|---|---|---|---|---|---|---|---|-------|---|---|---|---|---|---|---|---|---|
| Hs   | R | F | Q | E | T | F | E | D | V | Hs    | L | C | G | H | D | H | N | L | Q |
| Mm   | R | F | Q | E | T | F | E | D | V | Mm    | L | C | G | H | D | H | N | L | Q |
| Rn   | R | F | Q | E | T | F | E | D | V | Rn    | L | C | G | H | D | H | N | L | Q |
| Ss   | R | F | Q | E | T | F | E | D | V | Ss    | L | C | G | H | D | H | N | L | Q |
| Xt   | R | F | K | I | T | F | E | S | V | Xt    | L | C | G | H | E | H | N | M | Q |
| Dr   | R | F | Q | E | T | F | E | D | V | Dr    | L | C | G | H | D | H | N | L | Q |
| At   | N | F | E | Q | S | F | S | N | I | At    | M | N | G | H | D | H | C | L | Q |

  

| M264K |   |   |   |   |   |   |   |   |   | G215R |   |   |   |   |   |   |   |   |   |
|-------|---|---|---|---|---|---|---|---|---|-------|---|---|---|---|---|---|---|---|---|
| Hs    | A | G | N | F | M | D | P | S | K | Hs    | I | A | E | H | G | P | T | H | C |
| Mm    | A | G | N | F | M | D | P | S | V | Mm    | I | A | E | H | G | P | T | R | C |
| Rn    | A | G | N | F | M | D | P | S | V | Rn    | I | A | E | H | G | P | T | R | C |
| Ss    | A | G | N | F | M | D | P | S | K | Ss    | I | A | E | H | G | P | T | H | C |
| Xt    | A | G | N | F | M | E | N | S | Q | Xt    | V | A | E | H | G | P | T | N | C |
| Dr    | A | G | N | F | M | D | P | D | V | Dr    | I | S | E | H | G | P | T | D | C |
| At    | A | G | S | K | A | W | R | G | D | At    | I | G | H | H | G | D | T | K | E |

Amino acids altered by *ACP5* missense mutations are boxed in red. Homologues were identified on the NCBI Entrez Protein Database and aligned using CLUSTALW2. Species abbreviations and sequence identifiers are as follows: Hs: *Homo sapiens* (NP\_001104505); Mm: *Mus musculus* (NP\_031414.1); Rn: *Rattus norvegicus* (NP\_062017.1); Ss: *Sus scrofa* (NP\_999374.1); Xt: *Xenopus (Silurana) tropicalis* (NP\_001008210.1); Dr: *Danio rerio* (NP\_999938.1); At: *Arabidopsis thaliana* (NP\_198072.1).

**Supplementary Figure 3. Microarray analysis in patients with TRAP deficiency.**

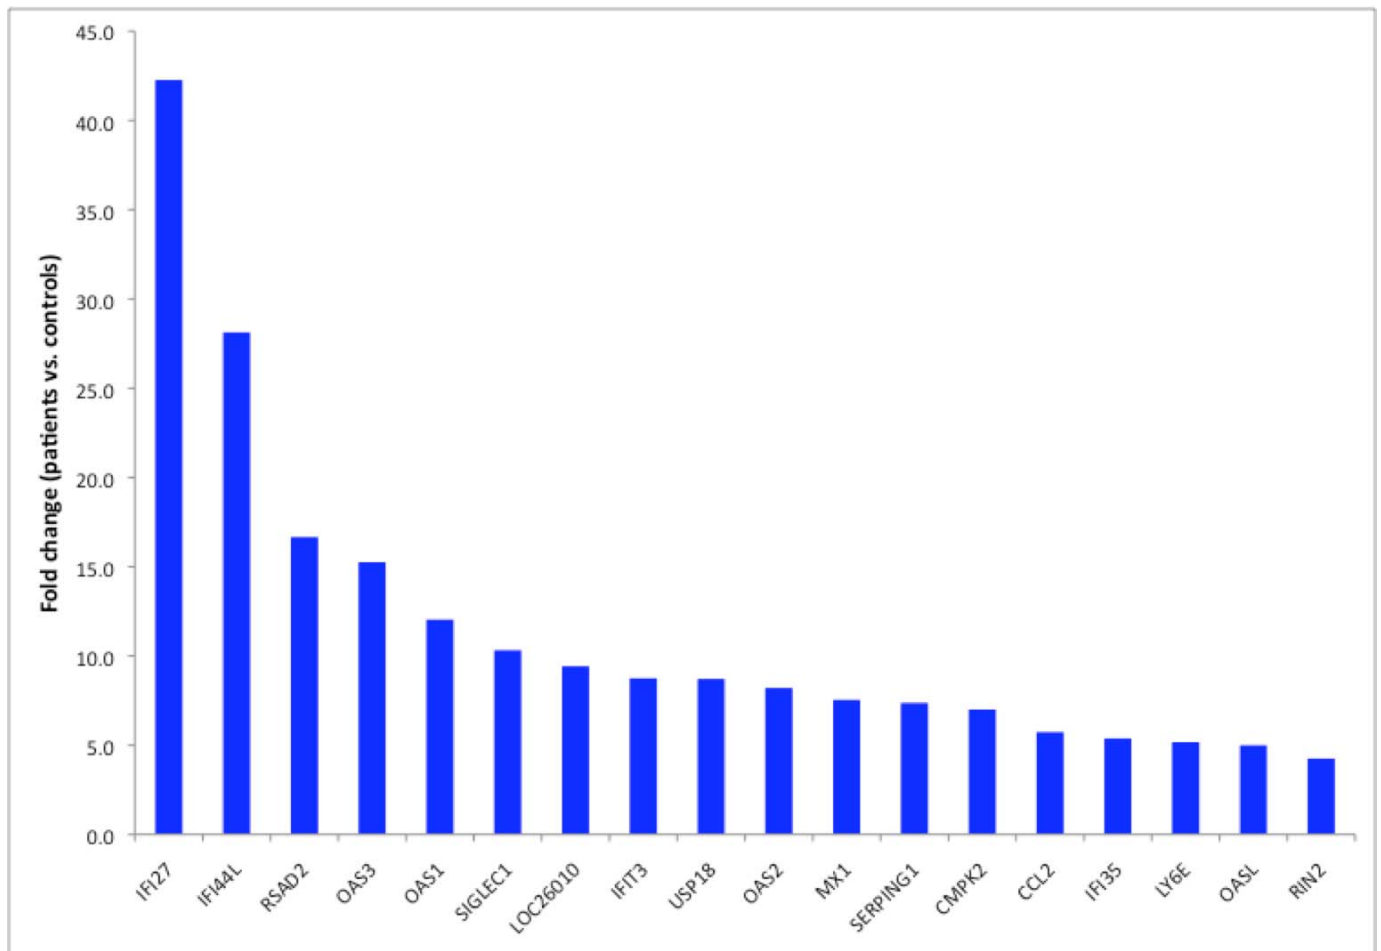

Whole transcriptome microarray expression analysis was undertaken in three patients, and compared to the data derived from three age-matched control samples. Panel depicts a subset of 18 genes that were four or more fold up-regulated in patients, with a significance level for the comparisons of  $p < 0.0005$  and a false discovery value of  $< 0.2$ . Fifteen of these genes are known to be interferon stimulated, characteristic of a type I interferon signature.

**Supplementary Figure 4. Plasma osteopontin levels in TRAP deficient patients and controls.**

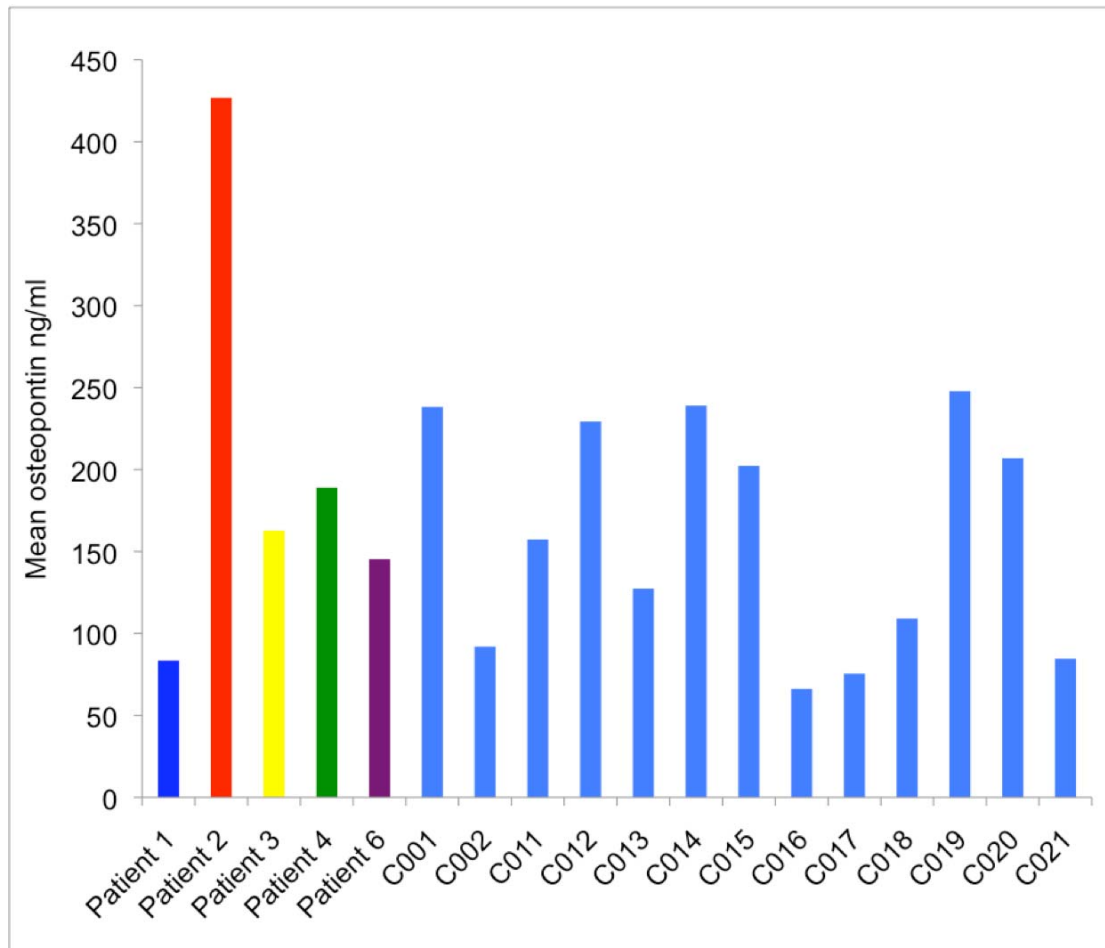

Panel depicts mean levels of osteopontin (ng/ml) in patients and controls. Plasma osteopontin activity was measured with a Quantikine® human osteopontin quantitative sandwich enzyme immunoassay (R&D Systems). Each sample was measured in duplicate at 2 or 3 dilutions of plasma, and the mean taken of non-conflicting results. Patients and controls were age (Mann-Whitney U test  $p=NS$ ) and sex (chi-squared test  $p=NS$ ) matched. Levels of osteopontin in patients and controls were not significantly different (Mann-Whitney U test  $p=NS$ ). C001 is an unaffected sibling of patients 2 and 3, carrying no *ACP5* mutations.

**Supplementary Table 1. Characteristics of patients and their clinical disease.**

[illegible]

| Characteristic                             | Patient 1    | Patient 2   | Patient 3                             | Patient 4               | Patient 5    | Patient 6                                    | Patient 7                                   | Patient 8                      | Patient 9                   | Patient 10                |
|--------------------------------------------|--------------|-------------|---------------------------------------|-------------------------|--------------|----------------------------------------------|---------------------------------------------|--------------------------------|-----------------------------|---------------------------|
| Nervous system involvement                 |              |             |                                       |                         |              |                                              |                                             |                                |                             |                           |
| Spasticity                                 | No           | Yes         | No                                    | Yes                     | No           | Yes                                          | No                                          | No                             | No                          | Yes                       |
| Mild cognitive delay                       | Yes          | Yes         | No                                    | No                      | No           | No                                           | No                                          | No                             | No                          | No                        |
| Intracranial calcification                 | Yes          | No          | Not assessed                          | Yes                     | Not assessed | Yes                                          | Yes                                         | Not assessed                   | No                          | Not assessed              |
| Neuropathy                                 | Yes          | No          | No                                    | No                      | No           | No                                           | No                                          | No                             | No                          | No                        |
| Autoimmunity                               |              |             |                                       |                         |              |                                              |                                             |                                |                             |                           |
| Raynaud's phenomenon<br>(RP) or vasculitis | Yes (RP)     | No          | No                                    | Yes<br>(vasculitis)     | Yes (RP)     | No                                           | No                                          | No                             | No                          | No                        |
| Antinuclear antibodies<br>(titer)          | Yes (1:1280) | Yes (1:640) | No                                    | Yes (1:640)             | No           | Yes (>1:320)                                 | Yes (strongly<br>positive on<br>immunoblot) | Yes (1:1280)                   | Yes (1:1600)                | Yes (1:640)               |
| Anti-dsDNA antibodies<br>(titer)           | No           | Yes (1:320) | No                                    | Yes (100 Farr<br>IU/ml) | No           | Yes (1:1280)                                 | Yes (strongly<br>positive on<br>immunoblot) | Yes (>500<br>Farr IU/ml)       | Yes<br>121 (n<100)<br>ELISA | Yes<br>33 (n<20)<br>ELISA |
| Thrombocytopenia                           | No           | Yes         | Yes (requiring<br>steroid<br>therapy) | No                      | No           | No                                           | Yes                                         | Yes (requiring<br>splenectomy) | Yes                         | No                        |
| Autoimmune hemolytic<br>anemia             | No           | No          | No                                    | No                      | No           | Yes (requiring<br>therapy with<br>rituximab) | No                                          | No                             | Yes                         | No                        |

[illegible]

| Characteristic                  | Patient 1                                                                                            | Patient 2 | Patient 3 | Patient 4 | Patient 5 | Patient 6 | Patient 7                                                                       | Patient 8                                          | Patient 9 | Patient 10 |
|---------------------------------|------------------------------------------------------------------------------------------------------|-----------|-----------|-----------|-----------|-----------|---------------------------------------------------------------------------------|----------------------------------------------------|-----------|------------|
| Myositis                        | Yes (necrosis and inflammatory infiltrates on muscle biopsy and elevated muscle enzymes 10 x normal) | No        | No        | No        | No        | No        | No                                                                              | No                                                 | No        | No         |
| History of recurrent infections | No                                                                                                   | No        | No        | No        | No        | No        | Yes (three episodes of lobar pneumonia; cutaneous herpes simplex, tuberculosis) | Yes (two episodes of lobar pneumonia in childhood) | No        | No         |

| Characteristic                                          | Patient 1                                                                                               | Patient 2                                                    | Patient 3 | Patient 4 | Patient 5 | Patient 6                                                          | Patient 7 | Patient 8 | Patient 9                                | Patient 10                                                                             |
|---------------------------------------------------------|---------------------------------------------------------------------------------------------------------|--------------------------------------------------------------|-----------|-----------|-----------|--------------------------------------------------------------------|-----------|-----------|------------------------------------------|----------------------------------------------------------------------------------------|
| Other                                                   | Hypertension;<br>intestinal tract<br>dysmotility;<br>intracranial<br>aneurysm;<br>acute<br>pancreatitis | Libman-Sacks<br>endocarditis;<br>possible<br>cerebral infact | None      | None      | None      | Persistent<br>hypogamma-<br>globulinemia<br>following<br>rituximab | None      | Vitiligo  | Myelitis.<br>Anticardiolipin<br>syndrome | Rheumatic<br>fever with<br>hypogamma-<br>globulinemia;<br>IGF1 + 2.5SD;<br>BMD + 1.5SD |
| Described in previous publication<br>(reference number) | Yes (1)                                                                                                 | No                                                           | No        | Yes (1)   | No        | Yes (2)                                                            | Yes (3,4) | Yes (5)   | No                                       | No                                                                                     |

†As reported by the parents of the patients

**Supplementary Table 2. Interferon neutralization assay.**

|                          | IFNa2<br>(Introna)<br>20iu/ml | IFN beta<br>(Biogen)<br>200iu/ml | IFN<br>patient 6<br>6iu/ml | IFN<br>patient 1<br>16iu/ml | IFN<br>patient 2<br>12iu/ml |
|--------------------------|-------------------------------|----------------------------------|----------------------------|-----------------------------|-----------------------------|
| Serum antiIFNa2          | >160**                        | <10                              | >160                       | >160                        | >160                        |
| Serum<br>anti beta       | <10                           | >160                             | <10                        | <10                         | 10                          |
| Serum<br>anti alpha/beta | >160                          | >160                             | >160                       | >160                        | >160                        |

\*\*Titer as the reciprocal of the dilution which completely inhibits the IFN activity

A neutralization assay was performed on serum from patients 1, 2 and 6, together with an interferon alpha and beta reference. Samples were incubated with serial fold dilutions of anti-interferon alpha, beta and alpha/beta serum. This was then analysed in a standard cytopathic reduction assay and a neutralization titre was determined as a reciprocal of the antibody dilution that suppressed the interferon activity.<sup>6</sup>

**Supplementary Table 3. Genes significantly up-regulated fourfold or more in a microarray analysis of TRAP deficient patients versus controls.**

| Gene name                                                      | Gene<br>symbol | Reference<br>sequence | Fold change<br>(patients vs.<br>controls) | <i>p</i> -value<br>(patients vs.<br>controls) | <i>q</i> -value<br>(patients vs.<br>controls) | References* |
|----------------------------------------------------------------|----------------|-----------------------|-------------------------------------------|-----------------------------------------------|-----------------------------------------------|-------------|
| Interferon alpha-inducible protein 27                          | IFI27          | NM_001130080          | 42.3                                      | 0.000136                                      | 0.115                                         | 7,8,9       |
| Interferon-induced protein 44-like                             | IFI44L         | NM_006820             | 28.1                                      | 0.000110                                      | 0.100                                         | 8,10        |
| Radical S-adenosyl methionine domain<br>containing 2; Viperin  | RSAD2          | NM_080657             | 16.7                                      | 0.000357                                      | 0.169                                         | 7,8,10,11   |
| 2',5'-oligoadenylate synthetase 3, 100kDa                      | OAS3           | NM_006187             | 15.3                                      | 0.000018                                      | 0.057                                         | 8,9         |
| 2',5'-oligoadenylate synthetase 1, 40/46kDa                    | OAS1           | NM_016816             | 12.0                                      | 0.000010                                      | 0.040                                         | 8,9,10      |
| Sialic acid binding Ig-like lectin 1                           | SIGLEC1        | NM_023068             | 10.3                                      | 0.000001                                      | 0.012                                         | 12          |
| Viral DNA polymerase-transactivated protein<br>6               | LOC26010       | NM_001100422          | 9.4                                       | 0.000028                                      | 0.074                                         |             |
| Interferon-induced protein with<br>tetratricopeptide repeats 3 | IFIT3          | NM_001031683          | 8.8                                       | 0.000190                                      | 0.123                                         | 13,14       |

| Gene name                                                                 | Gene<br>symbol | Reference<br>sequence | Fold change<br>(patients vs.<br>controls) | p-value<br>(patients vs.<br>controls) | q-value<br>(patients vs.<br>controls) | References* |
|---------------------------------------------------------------------------|----------------|-----------------------|-------------------------------------------|---------------------------------------|---------------------------------------|-------------|
| Ubiquitin specific peptidase 18                                           | USP18          | NM_017414             | 8.7                                       | 0.000009                              | 0.040                                 | 15          |
| 2',5'-oligoadenylate synthetase 2, 69/71kDa                               | OAS2           | NM_002535             | 8.2                                       | 0.000099                              | 0.099                                 | 8,9,10      |
| Myxovirus (influenza virus) resistance 1,<br>interferon-inducible protein | Mx1            | NM_001144925          | 7.5                                       | 0.000300                              | 0.146                                 | 8,9,10,11   |
| Serpin peptidase inhibitor, clade G                                       | SERPING1       | NM_000062             | 7.4                                       | 0.000087                              | 0.099                                 | 10          |
| Cytidine monophosphate (UMP-CMP) kinase<br>2                              | CMPK2          | NM_207315             | 7.0                                       | 0.000087                              | 0.099                                 |             |
| Chemokine (C-C motif) ligand 2                                            | CCL2           | NM_002982             | 5.7                                       | 0.000389                              | 0.179                                 | 9           |
| Interferon-induced protein 35                                             | IFI35          | NM_005533             | 5.4                                       | 0.000076                              | 0.099                                 | 9           |
| Lymphocyte antigen 6 complex, locus E                                     | Ly6E           | NM_002346             | 5.2                                       | 0.000190                              | 0.123                                 | 8           |
| 2',5'-oligoadenylate synthetase-like                                      | OASL           | NM_003733             | 5.0                                       | 0.000092                              | 0.099                                 | 16          |
| Ras and Rab interactor 2                                                  | RIN2           | NM_018993             | 4.3                                       | 0.000047                              | 0.094                                 |             |

\*References provided are to studies demonstrating stimulation by interferon and/or up-regulation in autoimmune phenotypes.

**Supplementary Table 4. Assessment of circulating inducers of type I interferon activity in TRAP deficient patient sera compared to patients with idiopathic lupus.<sup>17</sup>**

| Patient   | Serum interferon<br>alpha titer (IU/ml) | Innoculum (ul)<br>to PBMC | Interferon alpha<br>(IU/ml)<br>produced in cell<br>culture |
|-----------|-----------------------------------------|---------------------------|------------------------------------------------------------|
| Lupus 1   | 37                                      | 50                        | 60                                                         |
| Lupus 2   | 35                                      | 50                        | 250                                                        |
| Lupus 3   | 75                                      | 25                        | 16                                                         |
| Patient 1 | 25                                      | 50                        | <2                                                         |
| Patient 2 | 18                                      | 50                        | <2                                                         |
| Patient 6 | 50                                      | 50                        | <2                                                         |

25 / 50 ul aliquots of lupus / SPENCD patient serum were incubated with 475 / 450µl of freshly isolated peripheral blood mononuclear cells (PBMC)( $1.5 \times 10^6$ /ml) at 37° Centigrade for 18 hours. Supernatants were then removed and type I interferon activity measured as described in the Methods section.

**Supplementary Table 5. Interferon gamma levels in TRAP deficient patients.**

| Patient | Interferon gamma level (pg/ml) |
|---------|--------------------------------|
| 1       | N.D.                           |
| 2       | N.D.                           |
| 3       | N.D.                           |
| 4       | N.D.                           |
| 5       | N.D.                           |
| 6       | N.D.                           |

Interferon gamma levels were assayed in six patients using a quantitative sandwich enzyme immunoassay (Quantikine Human IFN-g Immunoassay, R&D Systems), with a sensitivity of 8 pg/ml. All results were below the limit of detectability (N.D.) of the assay.

**Supplementary Table 6. Expression of *ACP5* in different human cell types.**

| Cell type | Fold relative to pDC |
|-----------|----------------------|
| PBMC      | 1                    |
| Mo        | 7                    |
| M1        | 69                   |
| DC        | 81                   |

PBMC = peripheral blood mononuclear cells; Mo = monocytes; M1 = macrophages; DC = dendritic cells; pDC = plasmacytoid dendritic cells.

Peripheral blood mononuclear cells (PBMCs) were isolated from heparinized venous blood of healthy volunteers by density-gradient centrifugation over Ficoll-Paque (Amersham Biosciences). Plasmacytoid dendritic cells (pDCs) were isolated to >97% purity using the EasySep® Human Plasmacytoid DC Enrichment Kit (StemCell Technologies). Monocytes were isolated from PBMC and  $1 \times 10^6$  were seeded in a 24-well culture plate with 1ml RPMI/10% FBS. RNA was harvested after overnight culture. Macrophages were cultured by seeding  $1 \times 10^6$  monocytes in a 24-well culture plate for 7 days with 100ng/ml GM-CSF. Dendritic cells were cultured by seeding  $1 \times 10^6$  monocytes in a 24-well culture plate for 7 days with 100ng/ml GM-CSF + 20ng/ml IL-4. RNA was extracted using the Qiagen RNeasy kit. qPCR of human *ACP5* was performed using SensiMix SYBR Low-ROX kit master mix (Bioline, London, UK) and compared with *18S*.

**Supplementary Table 7. Expression of *ACP5* and *Mx1* following stimulation of human pDCs.**

| Stimulus   | Fold relative to unstimulated pDC |            |
|------------|-----------------------------------|------------|
|            | <i>ACP5</i>                       | <i>Mx1</i> |
| Interferon | 0.6                               | 63         |
| CpG        | 1.4                               | 2.6        |

Plasmacytoid dendritic cell (pDC) cultures ( $1-2 \times 10^5$ /well in a 96-well round-bottom tissue culture plate, total volume 200 $\mu$ L) were incubated with Universal Type I Interferon (500U/mL, PBL Interferon Source) or Type A CpG ODN 2216 (200nM, InvivoGen) for 4 hours. qPCR of human *ACP5* was performed using SensiMix SYBR Low-ROX kit master mix (Bioline, London, UK) and compared with *18S*.

## References

1. Navarro, V. *et al.* TWO further cases of spondyloenchondrodysplasia (SPENCD) with immune dysregulation. *Am. J. Med. Genet. A* **146A**:2810-5 (2008).
2. Renella, R. *et al.* SPONDYLOENCHONDRODYSPLASIA with spasticity, cerebral calcifications, and immune dysregulation: Clinical and radiographic delineation of a pleiotropic disorder. *Am. J. Med. Genet. A* **140A**:541-50 (2006).
3. Kulkarni, M.L., Baskar, K. & Kulkarni, P.M. A syndrome of immunodeficiency, autoimmunity and spondylometaphyseal dysplasia. *Am. J. Med. Genet. A* **143A**:69-75 (2007).
4. Renella, R. & Superti-Furga, A. A new case of spondyloenchondrodysplasia with immune dysregulation confirms the pleiotrophic nature of the disorder: comment on 'A syndrome of immunodeficiency, autoimmunity and spondylometaphyseal dysplasia' by M.L.Kulkarni, K.Baskar and P.M.Kulkarni. *Am. J. Med. Genet. A* **143A**:1394-5 (2007).
5. Roifman, C.M. & Melamed, I. A novel syndrome of combined immunodeficiency, autoimmunity and spondylometaphyseal dysplasia. *Clin. Genet.* **63**:522-9 (2003).
6. Lallemand, C., Meritet, J.F., Blanchard, B., Lebon, P., & Tovey, M.G. ONE-STEP assay for quantification of neutralizing antibodies to biopharmaceuticals. *J. Immunol. Methods.* **356(1-2)**:18-28 (2010).
7. Ishii, T. *et al.* ISOLATION and Expression Profiling of Genes Upregulated in the Peripheral Blood of Systemic Lupus Erythematosus Patients. *DNA Res.* **12**:429-39 (2005).
8. Nzeusseu Toukap, A. *et al.* IDENTIFICATION of Distinct Gene Expression Profiles in the Synovium of Patients With Systemic Lupus Erythematosus. *Arthritis Rheum.* **56**:1579-88 (2007).
9. Baechler, E.C. *et al.* AN Interferon Signature in the Peripheral Blood of Dermatomyositis Patients is Associated with Disease Activity. *Mol. Med.* **13**:59-68 (2007).

10. Van Baarsen, L.G.M. *et al.* REGULATION of IFN response gene activity during infliximab treatment in rheumatoid arthritis is associated with clinical response to treatment. *Arthritis Res. Ther.* **12**:R11 (2010).
11. Bennett, L. *et al.* INTERFERON and Granulopoiesis Signatures in Systemic Lupus Erythematosus *Blood. J. Exp. Med.* **197**:711-23 (2003).
12. York, M.R. *et al.* A MACROPHAGE Marker, Siglec-1, Is Increased on Circulating Monocytes in Patients With Systemic Sclerosis and Induced by Type I Interferons and Toll-like Receptor Agonists. *Arthritis Rheum.* **56**:1010-20 (2007).
13. Wildenberg, M.E., van Helden-Meeuwsen, C.G., van de Merwe, J.P., Drexhage, H.A. & Versnel, M.A. SYSTEMIC increase in type I interferon activity in Sjögren's syndrome: A putative role for plasmacytoid dendritic cells. *Eur. J. Immunol.* **38**:2024-33 (2008).
14. Huang, X. *et al.* INTERFERON-INDUCED protein IFIT4 is associated with systemic lupus erythematosus and promotes differentiation of monocytes into dendritic cell-like cells. *Arthritis. Res. Ther.* **10**:R91 (2008).
15. Wang, J., Campbell, I.L. & Zhang, H. SYSTEMIC interferon- $\alpha$  regulates interferon-stimulated genes in the central nervous system. *Mol. Psychiatry* **13**:293-301 (2008).
16. Hovanessian, A.G. & Justesen, J. THE human 2'-5' oligoadenylate synthetase family: Unique interferon-inducible enzymes catalyzing 2'-5' instead of 3'-5' phosphodiester bond formation. *Biochimie.* **89**:779-88 (2007).
17. Batteux, F., Palmer, P., Daéron, M., Weill, B., Lebon, P. FCGAMMARII (CD32) – dependent induction of interferon-alpha by serum from patients with lupus erythematosus. *Eur Cytokine Netw.* **10**:509-514 (1999).
